# Supplementary material for: Cyclosporine Biosynthesis in Tolypocladium inflatum Benefits Fungal Adaptation to the Environment
Source: PubMed Central journal article supplement (PMC6168864; doi:10.1128/mbio.01211-18), 2018-10-02
Supplement: mbo005184087st1.pdf [file mbo005184087st1.pdf]

**Table S1.** NMR data for identification of Bmt.<sup>a</sup>

| No.                     | $\delta_{\text{H}}$ (mult., J in Hz) | $\delta_{\text{C}}$ | HMBC (H→C)                  | <sup>1</sup> H- <sup>1</sup> H COSY |
|-------------------------|--------------------------------------|---------------------|-----------------------------|-------------------------------------|
| <b>1</b>                |                                      | 173.4               |                             |                                     |
| <b>2</b>                | 3.77 <sup>b</sup>                    | 56.6                | 1, 3, 4                     |                                     |
| <b>3</b>                | 3.80 <sup>b</sup>                    | 73.4                | 1, 4, 4-CH <sub>3</sub> , 5 | 4                                   |
| <b>4</b>                | 1.55                                 | 35.3                |                             | 3, 5                                |
| <b>4-CH<sub>3</sub></b> | 0.83, d (6.0)                        | 14.9                |                             | 4                                   |
| <b>5</b>                | 2.23, m<br>1.85, m                   | 34.7                | 4, 4-CH <sub>3</sub> , 6, 7 | 6<br>4, 6                           |
| <b>6</b>                | 5.46, m                              | 128.2 <sup>c</sup>  | 5, 8                        | 5                                   |
| <b>7</b>                | 5.46, m                              | 128.4 <sup>c</sup>  | 5, 8                        | 8                                   |
| <b>8</b>                | 1.57, d (6.0)                        | 17.2                | 6, 7                        | 7                                   |

<sup>a</sup> Recorded in D<sub>2</sub>O at 500 MHz.

<sup>b</sup> Signals overlapped with each other.

<sup>c</sup> Values with identical superscripts in each column may be interchanged.
