# Supplementary material for: Cyclosporine Biosynthesis in Tolypocladium inflatum Benefits Fungal Adaptation to the Environment
Source: PubMed Central journal article supplement (PMC6168864; doi:10.1128/mbio.01211-18), 2018-10-02
Supplement: mbo005184087st2.pdf [file mbo005184087st2.pdf]

**Table S2.** Primers designed and used in this study.

| Genes                    | Primers | Primer sequence*                            | Restriction enzymes | Note             |
|--------------------------|---------|---------------------------------------------|---------------------|------------------|
| <i>SimN</i><br>TINF00183 | U1      | GGAATTC <del>CCCGAGCAGTGGAACTTCTTC</del>    | <i>EcoR</i> I       | Gene deletion    |
|                          | U2      | CGGGATCC <del>ATATGTTCCGTCGCAAGAGC</del>    | <i>BamH</i> I       |                  |
|                          | L1      | GACTAGT <del>ACCGGGTAGAGGCAGAAGAC</del>     | <i>Spe</i> I        |                  |
|                          | L2      | CGAGCTC <del>TGAACGTTGGTCAGTTGAGG</del>     | <i>Sac</i> I        |                  |
|                          | F       | GAGCCAGTCAGTCTTGGTGTC                       |                     | PCR verification |
|                          | R       | CGGAGAGGTGATGGATGG                          |                     |                  |
| <i>SimA</i><br>TINF00159 | U1      | GGAATTC <del>TATCGGGCAAATCTTCATGG</del>     | <i>EcoR</i> I       | Gene deletion    |
|                          | U2      | TCCCCCGGG <del>CGGTATTGAATGGGAATTGG</del>   | <i>Sma</i> I        |                  |
|                          | L1      | GCTCTAG <del>AATACCCGATGTTGAGTTGCTG</del>   | <i>Xba</i> I        |                  |
|                          | L2      | CGAGCTC <del>CAGTTGCTACGGATGCTTGA</del>     | <i>Sac</i> I        |                  |
|                          | F       | CTGGCAGAGGAACAAACCAT                        |                     | PCR verification |
|                          | R       | GAAGATGACGTAGGCCAGGT                        |                     |                  |
| <i>SimB</i><br>TINF00247 | U1      | TCCCCCGGG <del>TCTGGCAATGGTTGTCTATCTG</del> | <i>Sma</i> I        | Gene deletion    |
|                          | U2      | CGGGATCC <del>CAGAGCTGCTTCTTTGCCACA</del>   | <i>BamH</i> I       |                  |
|                          | L1      | GACTAGT <del>GGGCTCGAGGGACCTTATAG</del>     | <i>Spe</i> I        |                  |
|                          | L2      | CGAGCTC <del>CCTGTCACTCCCAAGGGAAAA</del>    | <i>Sac</i> I        |                  |
|                          | F       | CCACGCTCAATGATGATGTC                        |                     | PCR verification |
|                          | R       | CCGGGACCAAAGTTCTCTATC                       |                     |                  |
| <i>SimC</i><br>TINF00586 | U1      | GGAATTC <del>GACCAAAAAATTCGGGTTGAA</del>    | <i>EcoR</i> I       | Gene deletion    |
|                          | U2      | GGAATTC <del>GGATTGGAAGGGTAAAACG</del>      | <i>EcoR</i> I       |                  |
|                          | L1      | GCTCTAG <del>AGTTGCTGTTGCGATTCCCTT</del>    | <i>Xba</i> I        |                  |
|                          | L2      | GCTCTAG <del>ACGGTATCCTTTCGACGACAT</del>    | <i>Xba</i> I        |                  |
|                          | F       | TCCTTGCCCTCGTTTTACC                         |                     | PCR verification |
|                          | R       | GATGCGGTGTAGGTAGGAGC                        |                     |                  |
| <i>SimD</i><br>TINF00536 | U1      | GGAATTC <del>CAGATGTCAGCGTCACGACAG</del>    | <i>EcoR</i> I       | Gene deletion    |
|                          | U2      | TCCCCCGGG <del>ATCGCCATCATCTTCTCCAT</del>   | <i>Sma</i> I        |                  |
|                          | L1      | GCTCTAG <del>AGATTAGGACGGAGCTGGTGA</del>    | <i>Xba</i> I        |                  |
|                          | L2      | GCTCTAG <del>ACCCCTACACGCTCATTTCAT</del>    | <i>Xba</i> I        |                  |
|                          | F       | GACCCATACAGAAGCCCAGA                        |                     | PCR verification |
|                          | R       | GCCTTCGTCTACAGCTGGTC                        |                     |                  |
| <i>SimE</i><br>TINF00426 | U1      | CCGCTCG <del>AGCGAAAAGAAGATGGGGACTG</del>   | <i>Xho</i> I        | Gene deletion    |
|                          | U2      | CGGGATCC <del>CCTTGGGCGAAACTGTAGAC</del>    | <i>BamH</i> I       |                  |
|                          | L1      | GACTAGT <del>TTTCTACACTTGCCCCCTGGAC</del>   | <i>Spe</i> I        |                  |
|                          | L2      | CGAGCTC <del>GGAAGATGACCCGAAGATCCA</del>    | <i>Sac</i> I        |                  |
|                          | F       | CGCATGTGCGAGTATGTCTT                        |                     | PCR verification |
|                          | R       | CTCAGACACCTCACCAGCAC                        |                     |                  |
| <i>SimG</i><br>TINF00267 | U1      | GGAATTC <del>CCTCGCCTACCATGGAGATGT</del>    | <i>EcoR</i> I       | Gene deletion    |
|                          | U2      | AACTGCAGCTGGAACATCGTCCCAGACT                | <i>Pst</i> I        |                  |
|                          | L1      | GGACTAGT <del>AGCTTCAGCGTGTCCAAGAT</del>    | <i>Spe</i> I        |                  |
|                          | L2      | GCTCTAG <del>ATCTGCGATATCCCCAAGAAC</del>    | <i>Xba</i> I        |                  |
|                          | F       | CGTGACGTTGCTCTGACTGT                        |                     | PCR verification |
|                          | R       | CAAATCTTGGACACGCTGAA                        |                     |                  |
| <i>SimI</i><br>TINF00470 | U1      | GGAATTC <del>CACTCGGAAGCATTCTGACA</del>     | <i>EcoR</i> I       | Gene deletion    |
|                          | U2      | TCCCCCGGG <del>CAGCCACTCGTTCCTACTC</del>    | <i>Sma</i> I        |                  |
|                          | L1      | GCTCTAG <del>ATCTGCAACAGTGCAAAGACC</del>    | <i>Xba</i> I        |                  |

|                                    |        |                                       |               |                                                                         |
|------------------------------------|--------|---------------------------------------|---------------|-------------------------------------------------------------------------|
|                                    | L2     | <u>CGAGCTCCCTCTCAAGCCTAGCCAATG</u>    | <i>Sac</i> I  |                                                                         |
|                                    | F      | GCCGTTTCCCTGAATGAGTA                  |               |                                                                         |
|                                    | R      | GCAGCAGATTTTCGAAAGAC                  |               | PCR verification                                                        |
| <i>SimJ</i><br>TINF00351           | U1     | <u>GGAATTC</u> GGGAAGAAGCTCAACTCGTG   | <i>EcoR</i> I |                                                                         |
|                                    | U2     | CGGGATCCAAGTCTGATGGCTCCGAGAA          | <i>BamH</i> I | Gene deletion                                                           |
|                                    | L1     | <u>GACTAGT</u> GGATATGCCGTTATGGAGA    | <i>Spe</i> I  |                                                                         |
|                                    | L2     | <u>CGAGCTC</u> TAAGAGCAGCCAAACACACG   | <i>Sac</i> I  |                                                                         |
|                                    | F      | GCAAGTGACTCACCTCGTCA                  |               |                                                                         |
|                                    | R      | CGAGACGAACCCAAACATCT                  |               | PCR verification                                                        |
| <i>SimL</i><br>TINF00394           | U1     | CCGCTCGAGTTCGAGTTTTCTCGGTCTTTTC       | <i>Xho</i> I  |                                                                         |
|                                    | U2     | CGGGATCCCATGGCGTTAGGTCACACAC          | <i>BamH</i> I | Gene deletion                                                           |
|                                    | L1     | <u>GCTCTAGAT</u> ATGTCGGCCCTCAGATAACC | <i>Xba</i> I  |                                                                         |
|                                    | L2     | <u>GCTCTAGA</u> ATGTTTGCTGCTTCAACGTG  | <i>Xba</i> I  |                                                                         |
|                                    | F      | GTAACCAGATGGAGGCTTCG                  |               |                                                                         |
|                                    | R      | ATATGGCGTATTCGGTCCTG                  |               | PCR verification                                                        |
| TINF06009                          | U1     | GAATTCCTGCAGCCCATATAAATGCGCCTGCCAAC   | <i>BamH</i> I |                                                                         |
|                                    | U2     | TAATTGCGCGGATCCTCCTGACGTGACAAACAAGC   |               | Fusion PCR for double gene deletion                                     |
|                                    | L1     | ACCAGCCCTGACTAGTTTTGCTCGCACTTTGACAC   | <i>Spe</i> I  |                                                                         |
|                                    | L2     | TAGATCTAGAACTAGTCGATACTGCTCGAGTGACG   |               |                                                                         |
|                                    | F      | TCCTGTACCCTGCTAGATGATG                |               |                                                                         |
|                                    | R      | CTCCTGGGGCCCAACTAC                    |               | PCR verification                                                        |
| <i>SimL</i><br>(WT:: <i>SimL</i> ) | gpdA-F | CCACCGCGGTGGAGCTCCTGATAAGCAGCACCACGAA | <i>Sac</i> I  | Fusion PCR for gene overexpression in WT                                |
|                                    | gpdA-R | GACGGCGGGGTGACGGTGGT                  |               |                                                                         |
|                                    | 394-F  | CGTACCCCGCCGTCATGTCGTTCAAGAGGCCTTG    |               |                                                                         |
|                                    | 394-R  | CAAAAGCTGGAGCTCTCAGGCCGTTCTAAAGTTGC   |               |                                                                         |
|                                    | F      | CTCAACAACACCACCGTCA                   |               |                                                                         |
|                                    | R      | TCAGGCCGTTCTAAAGTTGC                  |               | PCR verification                                                        |
| $\beta$ -tubulin                   | Tub-F  | TGTCTACAACGGCACCTCTG                  |               | RT-PCR reference                                                        |
|                                    | Tub-R  | AGGTCTCGTCCGAGTTCTCA                  |               |                                                                         |
| <i>SimA-SimN</i>                   | SimA-F | CTGGCAGAGGAACAAACCAT                  |               |                                                                         |
|                                    | SimA-R | GAAGATGACGTAGGCCAGGT                  |               |                                                                         |
|                                    | SimB-F | CCACGCTCAATGATGATGTC                  |               |                                                                         |
|                                    | SimB-R | CCGGGACCAAAGTTCTCTATC                 |               |                                                                         |
|                                    | SimC-F | GTCTCTGTCTCTCTCCGC                    |               |                                                                         |
|                                    | SimC-R | GCCGTCTTTCATAACAGGGC                  |               |                                                                         |
|                                    | SimD-F | GACCCATACAGAAGCCCAGA                  |               |                                                                         |
|                                    | SimD-R | GCCTTCGTCTACAGCTGGTC                  |               |                                                                         |
|                                    | SimE-F | AAGGGAGAGGAGGAAAAGGC                  |               | Primer pairs for RT-PCR analysis of gene expression in WT:: <i>SimL</i> |
|                                    | SimE-R | AACTGTTCCGTCACCTCCAT                  |               |                                                                         |
|                                    | SimG-F | AGCCTCTCACCTTCAATGCT                  |               |                                                                         |
|                                    | SimG-R | GACTTTGCAGCAACTCACCA                  |               |                                                                         |
|                                    | SimI-F | CCCTGCCAGCAAGATTTGTT                  |               |                                                                         |
|                                    | SimI-R | CGTAACGCTTCATCCATGCA                  |               |                                                                         |
|                                    | SimJ-F | GCAAGTGACTCACCTCGTCA                  |               |                                                                         |
|                                    | SimJ-R | CGAGACGAACCCAAACATCT                  |               |                                                                         |
|                                    | SimL-F | CCAACACCGAGGTCAGAGAT                  |               |                                                                         |
|                                    | SimL-R | ATGTTTGCTGCTTCAACGTG                  |               |                                                                         |
|                                    | SimN-F | GAGCCAGTCAGTCTTGGTGTC                 |               |                                                                         |
|                                    | SimN-R | CGGAGAGGTGATGGATGG                    |               |                                                                         |

\* The introduced enzyme restriction sites are underlined.
